# Supplementary material
Source: PubMed Central journal article supplement (PMC2841507)
Supplement: NIHMS179954-supplement-1_si_001.pdf [file NIHMS179954-supplement-1_si_001.pdf]

**Synthesis and Biological Evaluation of Bupropion Analogues as Potential  
Pharmacotherapies for Smoking Cessation**

F. Ivy Carroll,<sup>a,\*</sup> Bruce E. Blough,<sup>a</sup> S. Wayne Mascarella,<sup>a</sup> Hernán A. Navarro,<sup>a</sup> J. Brek  
Eaton,<sup>b</sup>

Ronald J. Lukas,<sup>b</sup> and M. Imad Damaj<sup>c</sup>

<sup>a</sup>Center for Organic and Medicinal Chemistry, Research Triangle Institute, Research  
Triangle Park, North Carolina 27709-2194; <sup>b</sup>Division of Neurobiology, Barrow  
Neurological Institute, 350 West Thomas Road, Phoenix, AZ 85013; <sup>c</sup>Department of  
Pharmacology and Toxicology, Medical Campus, Virginia Commonwealth University,  
Richmond, VA 23219

**Supporting Information**

**Analysis Appendix**

\*Corresponding author:

Dr. F. Ivy Carroll

Research Triangle Institute

Post Office Box 12194

Research Triangle Park, NC 27709-2194

Telephone: 919 541-6679

Fax: 919 541-8868

E-mail: [fic@rti.org](mailto:fic@rti.org)

## Analysis

| Compd      | Formula                                                                              | Calculated |      |      | Found |      |      |
|------------|--------------------------------------------------------------------------------------|------------|------|------|-------|------|------|
|            |                                                                                      | C          | H    | N    | C     | H    | N    |
| <b>2e</b>  | C <sub>18</sub> H <sub>25</sub> NO <sub>6</sub>                                      | 61.52      | 7.17 | 3.99 | 61.49 | 7.20 | 4.05 |
| <b>2f</b>  | C <sub>17</sub> H <sub>22</sub> N <sub>2</sub> O <sub>7</sub>                        | 55.73      | 6.05 | 7.65 | 55.68 | 6.08 | 7.60 |
| <b>2q</b>  | C <sub>14</sub> H <sub>19</sub> ClFNO                                                | 61.87      | 7.05 | 5.15 | 61.86 | 7.07 | 5.06 |
| <b>2s</b>  | C <sub>18</sub> H <sub>22</sub> BrNO <sub>5</sub>                                    | 52.44      | 5.38 | 3.40 | 52.43 | 5.39 | 3.41 |
| <b>2t</b>  | C <sub>19</sub> H <sub>25</sub> NO <sub>5</sub>                                      | 65.69      | 7.25 | 4.03 | 65.76 | 7.31 | 4.02 |
| <b>2u</b>  | C <sub>19</sub> H <sub>25</sub> NO <sub>6</sub>                                      | 62.80      | 6.93 | 3.85 | 62.83 | 6.93 | 3.98 |
| <b>2v</b>  | C <sub>17</sub> H <sub>19</sub> ClN <sub>2</sub> O <sub>3</sub> •0.5H <sub>2</sub> O | 54.64      | 6.55 | 9.10 | 54.94 | 6.26 | 8.88 |
|            | O                                                                                    |            |      |      |       |      |      |
| <b>2aa</b> | C <sub>13</sub> H <sub>17</sub> ClFNO                                                | 60.58      | 6.65 | 5.43 | 60.59 | 6.65 | 5.41 |
| <b>2bb</b> | C <sub>17</sub> H <sub>20</sub> BrNO <sub>5</sub>                                    | 51.27      | 5.06 | 3.52 | 51.17 | 5.17 | 3.58 |
| <b>2cc</b> | C <sub>18</sub> H <sub>23</sub> NO <sub>5</sub>                                      | 64.85      | 6.95 | 4.20 | 64.85 | 6.95 | 4.19 |
| <b>2dd</b> | C <sub>18</sub> H <sub>23</sub> NO <sub>6</sub>                                      | 61.88      | 6.64 | 4.01 | 61.91 | 6.64 | 4.09 |
| <b>2ee</b> | C <sub>13</sub> H <sub>17</sub> ClN <sub>2</sub> O <sub>3</sub> •H <sub>2</sub> O    | 51.57      | 6.33 | 9.25 | 51.51 | 6.27 | 9.17 |
